# Supplementary material
Source: PubMed Central journal article supplement (PMC2947887)
Supplement: 1006478107_pnas.201006478SI.pdf [file 1006478107_pnas.201006478SI.pdf]

# Supporting Information

Garmaroudi et al. 10.1073/pnas.1006478107

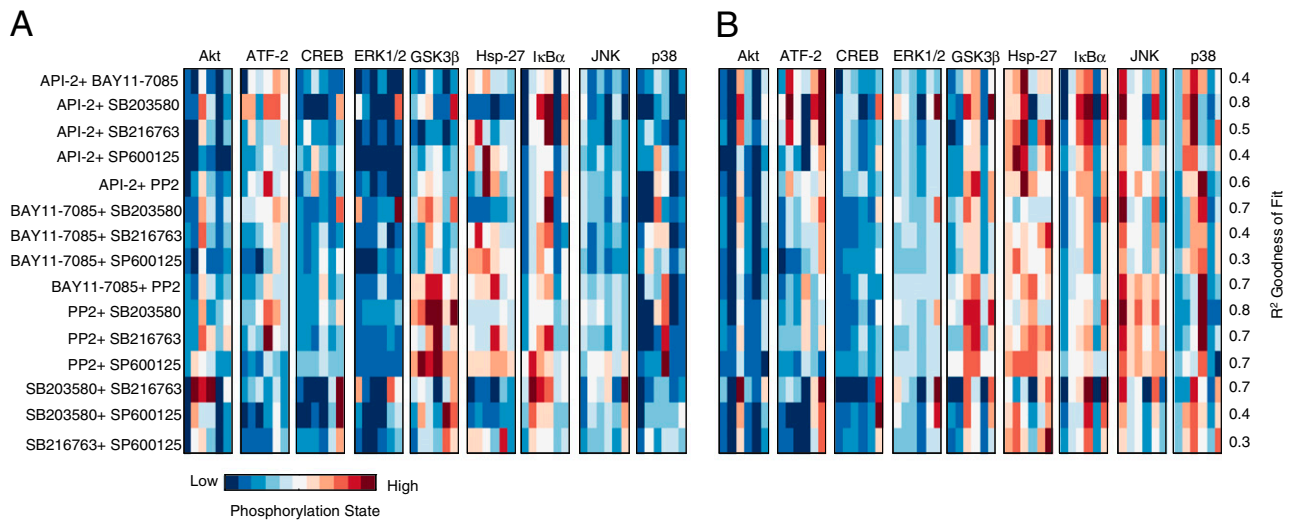

**Fig. S1.** Paired inhibitor combinations perturb CVB3-induced phosphorylation signatures nonadditively. (A) Measured inhibitor pairs were reprinted from Fig. 1 and compared with (B) an additive model, in which single inhibitor time courses from Fig. 1 were used to predict paired inhibitor signatures by adding the net perturbation of each inhibitor compared with the DMSO control. Differences between the measured and modeled signatures were evaluated by  $R^2$  goodness of fit (Right). The median  $R^2$  value was 0.6.

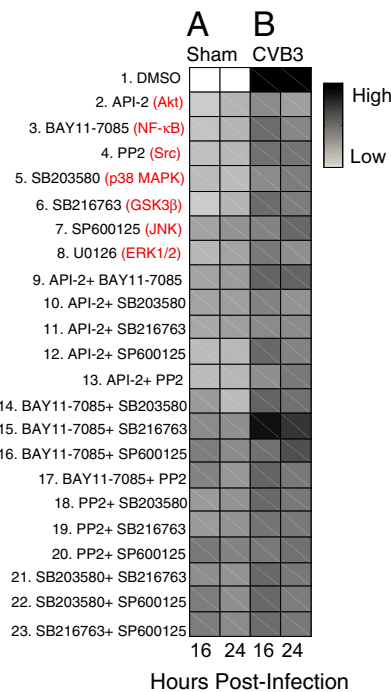

**Fig. S2.** Single and paired inhibitors specifically inhibit CVB3-induced cardiotoxicity. Cell death as measured by MTS assay is shown for (A) sham-infected cardiomyocytes or (B) CVB3-infected cardiomyocytes at 16 and 24 h p.i. HL1 cells were pretreated and infected as described in Fig. 1. Data are presented as the mean of three independent replicates. Cell death was normalized to the DMSO-treated control.



**Table S2. Scientific support for the CVB3 partial correlation network shown in Fig. 4B**

| Edge                                | Partial correlation | Reported interaction                                                                                | Ref(s).  |
|-------------------------------------|---------------------|-----------------------------------------------------------------------------------------------------|----------|
| Hsp-27-CREB                         | 0.5                 | Direct phosphorylation of Hsp-27 and CREB by RSK2                                                   | (1)      |
| JNK-I $\kappa$ B $\alpha$           | -0.5                | Inhibition of JNK activation by NF- $\kappa$ B-mediated induction of <i>GADD45B</i> and <i>XIAP</i> | (2, 3)   |
| p38-I $\kappa$ B $\alpha$           | 0.5                 | p38-mediated phosphorylation of MSK1 promotes NF- $\kappa$ B function, which induces <i>IKBA</i>    | (4, 5)   |
| ERK-CREB                            | 0.5                 | Direct phosphorylation of CREB through ERK-mediated phosphorylation of RSK                          | (6)      |
| Akt-GSK3 $\beta$                    | 0.4                 | Direct phosphorylation of GSK3 $\beta$ by Akt                                                       | (7)      |
| JNK-ATF-2                           | -0.3                | Direct phosphorylation of ATF-2 by JNK (negative correlation unexplained)                           | (8)      |
| I $\kappa$ B $\alpha$ -ATF-2        | -0.3                | Negative correlation unexplained                                                                    | —        |
| GSK3 $\beta$ -I $\kappa$ B $\alpha$ | 0.3                 | GSK3 $\beta$ required for normal NF- $\kappa$ B function, which induces <i>IKBA</i>                 | (9–11)   |
| Akt-I $\kappa$ B $\alpha$           | 0.3                 | Direct phosphorylation of I $\kappa$ B $\alpha$ through Akt-mediated phosphorylation of IKK         | (12, 13) |
| p38-Hsp-27                          | 0.3                 | Direct phosphorylation of Hsp-27 through p38-mediated phosphorylation of MK2                        | (14, 15) |

- Kang S, et al. (2010) p90 ribosomal S6 kinase 2 promotes invasion and metastasis of human head and neck squamous cell carcinoma cells. *J Clin Invest* 120:1165–1177.
- De Smaele E, et al. (2001) Induction of *gadd45beta* by NF- $\kappa$ B downregulates pro-apoptotic JNK signalling. *Nature* 414:308–313.
- Tang G, et al. (2001) Inhibition of JNK activation through NF- $\kappa$ B target genes. *Nature* 414:313–317.
- Deak M, Clifton AD, Lucocq LM, Alessi DR (1998) Mitogen- and stress-activated protein kinase-1 (MSK1) is directly activated by MAPK and SAPK2/p38, and may mediate activation of CREB. *EMBO J* 17:4426–4441.
- Vermeulen L, De Wilde G, Van Damme P, Vanden Berghe W, Haegeman G (2003) Transcriptional activation of the NF- $\kappa$ B p65 subunit by mitogen- and stress-activated protein kinase-1 (MSK1). *EMBO J* 22:1313–1324.
- Chen RH, Sarnecki C, Blenis J (1992) Nuclear localization and regulation of erk- and rsk-encoded protein kinases. *Mol Cell Biol* 12:915–927.
- Cross DA, Alessi DR, Cohen P, Andjelkovich M, Hemmings BA (1995) Inhibition of glycogen synthase kinase-3 by insulin mediated by protein kinase B. *Nature* 378:785–789.
- Gupta S, Campbell D, Dérjard B, Davis RJ (1995) Transcription factor ATF2 regulation by the JNK signal transduction pathway. *Science* 267:389–393.
- Hoeflich KP, et al. (2000) Requirement for glycogen synthase kinase-3 $\beta$  in cell survival and NF- $\kappa$ B activation. *Nature* 406:86–90.
- Haskill S, et al. (1991) Characterization of an immediate-early gene induced in adherent monocytes that encodes I kappa B-like activity. *Cell* 65:1281–1289.
- Sun SC, Ganchi PA, Ballard DW, Greene WC (1993) NF- $\kappa$ B controls expression of inhibitor I kappa B alpha: Evidence for an inducible autoregulatory pathway. *Science* 259:1912–1915.
- Esfandiarei M, et al. (2007) Coxsackievirus B3 activates nuclear factor kappa B transcription factor via a phosphatidylinositol-3 kinase/protein kinase B-dependent pathway to improve host cell viability. *Cell Microbiol* 9:2358–2371.
- Ozes ON, et al. (1999) NF- $\kappa$ B activation by tumour necrosis factor requires the Akt serine-threonine kinase. *Nature* 401:82–85.
- Stokoe D, Engel K, Campbell DG, Cohen P, Gaestel M (1992) Identification of MAPKAP kinase 2 as a major enzyme responsible for the phosphorylation of the small mammalian heat shock proteins. *FEBS Lett* 313:307–313.
- Rouse J, et al. (1994) A novel kinase cascade triggered by stress and heat shock that stimulates MAPKAP kinase-2 and phosphorylation of the small heat shock proteins. *Cell* 78:1027–1037.
